# Supplementary material for: Ligand influence in Li-ion battery hybrid active materials: Ni methylenediphosphonate vs. Ni dimethylamino methylenediphosphonate
Source: Royal Society of Chemistry journal article supplement (doi:10.1039/c7cc01982c), 2017-01-01
Supplement: c7cc01982c1.pdf [file c7cc01982c1.pdf]

# Ligand influence in Li-ion battery hybrid active materials: Ni methylenediphosphonate vs. Ni dimethylamino methylenediphosphonate

S. Schmidt <sup>a</sup>, S. Sallard <sup>a,†</sup>, D. Sheptyakov <sup>b</sup>, P. Novák <sup>a</sup> and C. Villevieille <sup>a</sup>

<sup>a</sup> Paul Scherrer Institute, Electrochemical Energy Storage Section, 5232 Villigen PSI, Switzerland

<sup>b</sup> Paul Scherrer Institute, Laboratory for Neutron Scattering and Imaging, 5232 Villigen PSI, Switzerland

## Supplementary information

### Methods

#### Synthesis

NiMeDP and NiDMAMDP were prepared by an adaption of the synthetic procedure described elsewhere.<sup>1</sup> To 20 mL of a 0.15 M tetraethyl methylenediphosphonate (98%, Alfa Aesar) 1 eq. Ni acetate tetrahydrate (98 %, Alfa Aesar) was added under stirring. Subsequently, the mixture was transferred into an autoclave with Teflon inlet, bubbled with Ar for 15 min and heated under autogenous pressure at 160 °C for 7days. The product was collected after centrifugation and repeated washing with H<sub>2</sub>O and ethanol.

#### Structural characterization

Phase identification was performed using X-ray diffraction (XRD) on a PANalytical Empyrean diffractometer using Cu K<sub>α</sub> radiation. For the structure determination, XRD on NiMeDP was measured at the MS powder beamline (X04SA) at the Swiss Light Source (SLS) at PSI, Switzerland using a wavelength of 0.7759 Å, in Debye-Scherrer geometry in a 0.5 mm glass capillary. The high resolution XRD pattern of NiMeDP was indexed and atomic positions were determined by direct methods followed by Fourier synthesis in EXPO2014,<sup>2</sup> and further refined by a Rietveld refinement performed in FullProf 3.0.0.<sup>3</sup>

#### Scanning Electron Microscopy

The scanning electron microscopy (SEM) images were recorded by a Carl Zeiss UltraTM 55 (Germany) apparatus at a 3 kV voltage using the in-lens detector. The powders were sputtered with gold by Ar plasma.

#### Electrode preparation and electrochemical measurements

Electrodes were prepared by doctor-blading a suspension of 50 wt-% active material, 40 wt-% SuperC65 (Imerys) carbon black conductive additive and 10 wt-% PVdF (Kynar<sup>®</sup>) on Cu foil.

Electrochemical measurements were performed in coin-cell type electrochemical cells. The materials were cycled in constant current/constant potential mode (CC/CP), i.e. galvanostatically at 50 mA/g between 0.1 – 3.0 V vs. Li<sup>+</sup>/Li followed by a 5 h potentiostatic step after each half cycle. The Li counter electrode served as pseudo-reference. All potentials subsequently reported are indicated vs. Li<sup>+</sup>/Li.

The reported specific charge values are corrected as the contribution of the carbon black to the total specific charge was subtracted (170 mAh/g) as described.<sup>4</sup>

*Ex situ* X-ray absorption spectroscopy (XAS) at the Ni K-edge was measured at the SuperXAS beamline at SLS using a Si(111) channel-cut monochromator<sup>5</sup> in transmission mode. The XAS data were analyzed using the Demeter software package.<sup>6</sup>

1. S. Schmidt, D. Sheptyakov, J.-C. Jumas, M. Medarde, P. Benedek, P. Novák, S. Sallard and C. Villevieille, *Chemistry of Materials*, 2015, **27**, 7889-7895.
2. A. Altomare, C. Cuocci, C. Giacovazzo, A. Moliterni, R. Rizzi, N. Corriero and A. Falcicchio, *Journal of Applied Crystallography*, 2013, **46**, 1231-1235.
3. J. Rodriguez-Carvajal, 1990.
4. S. Schmidt, S. Sallard, D. Sheptyakov, M. Nachtegaal, P. Novák and C. Villevieille, *Journal of Power Sources*, 2017, **342**, 879-885.
5. O. Müller, M. Nachtegaal, J. Just, D. Lützenkirchen-Hecht and R. Frahm, *Journal of Synchrotron Radiation*, 2016, **23**, 260-266.
6. B. Ravel and M. Newville, *Journal of Synchrotron Radiation*, 2005, **12**, 537-541.

**Table S1** Details of the Rietveld refinement of NiMeDP.

| <b>R-Factors</b>                       |          |              |          |                  |           |              |
|----------------------------------------|----------|--------------|----------|------------------|-----------|--------------|
| $R_p$                                  |          | $R_{wp}$     |          | $R_{exp}$        |           |              |
| 11.6%                                  |          | 14.2%        |          | 1.18%            |           |              |
| <b>Fitted unit cell parameters</b>     |          |              |          |                  |           |              |
| a [Å]                                  |          | b [Å]        |          | c [Å]            |           |              |
| 9.636(1)                               |          | 8.083(1)     |          | 9.104 (1)        |           |              |
| $\beta$                                |          |              |          |                  |           |              |
| 109.128(1) °                           |          |              |          |                  |           |              |
| <b>Atomic positions and parameters</b> |          |              |          |                  |           |              |
|                                        | X [Å]    | Y [Å]        | Z [Å]    | $B_{iso}$        | Occupancy |              |
| Ni1                                    | 0        | 0.5          | 0        | 1.38(4)          | 0.5       |              |
| Ni2                                    | 0.112(1) | 0.142(1)     | 0.015(1) | 1.70(3)          | 1         |              |
| P1                                     | 0.888(1) | 0.200(1)     | 0.184(1) | 1.15(5)          | 1         |              |
| O1                                     | 0.963(1) | 0.079(1)     | 0.095(1) | 0.5(1)           | 1         |              |
| O2                                     | 0.876(1) | 0.374(1)     | 0.114(1) | 1.6(1)           | 1         |              |
| O3                                     | 0.975(1) | 0.197(1)     | 0.352(1) | 0.7(1)           | 1         |              |
| C1                                     | 0.723(1) | 0.136(1)     | 0.182(1) | 0.6(1)           | 1         |              |
| P2                                     | 0.709(1) | -0.093(1)    | 0.217(1) | 1.82(6)          | 1         |              |
| O4                                     | 0.833(1) | -0.127(1)    | 0.363(1) | 1.3(1)           | 1         |              |
| O5                                     | 0.720(1) | -0.198(1)    | 0.062(1) | 2.8(2)           | 1         |              |
| O6                                     | 0.555(1) | -0.132(1)    | 0.241(1) | 3.3(1)           | 1         |              |
| O7                                     | 0.742(1) | 0.982(1)     | 0.799(1) | 1.8              | 1         |              |
| O8                                     | 0.551(1) | -0.016(2)    | 0.472(2) | 1.8              | 0.427(6)  |              |
| <b>Bond distances Atom1-Atom2</b>      |          |              |          |                  |           |              |
| Atom 1                                 | Atom 2   | $d_{12}$ [Å] |          | Atom 1           | Atom 2    | $d_{12}$ [Å] |
| <b>Ni-O bonds</b>                      |          |              |          | <b>P-O bonds</b> |           |              |
| Ni1                                    | O2       | 2.09(1)      |          | P1               | O1        | 1.59(1)      |
| Ni1                                    | O3       | 2.05(1)      |          | P1               | O2        | 1.53(1)      |
| Ni1                                    | O4       | 1.96(1)      |          | P1               | O3        | 1.48(1)      |
| Ni2                                    | O1(1)    | 1.96(1)      |          | P2               | O4        | 1.51(1)      |
| Ni2                                    | O1(2)    | 2.07(1)      |          | P2               | O5        | 1.59(1)      |
| Ni2                                    | O3       | 2.12(1)      |          | P2               | O6        | 1.60(1)      |
| Ni2                                    | O4       | 2.14(1)      |          | <b>P-C bonds</b> |           |              |
| Ni2                                    | O5       | 1.98(1)      |          | P1               | C1        | 1.67(1)      |
| Ni2                                    | O7       | 2.04(1)      |          | P2               | C1        | 1.89(1)      |

| Bond angles Atom1-Atom2-Atom3 |        |        |           |  |                           |        |        |           |
|-------------------------------|--------|--------|-----------|--|---------------------------|--------|--------|-----------|
| Atom 1                        | Atom 2 | Atom 3 | Angle [°] |  | Atom 1                    | Atom 2 | Atom 3 | Angle [°] |
| <b>Ligand bond angles</b>     |        |        |           |  | <b>O-Ni-O bond angles</b> |        |        |           |
| O1                            | P1     | O2     | 111(1)    |  | O3                        | Ni1    | O3     | 180(1)    |
| O1                            | P1     | O3     | 109(1)    |  | O3                        | Ni1    | O4     | 85(1)     |
| O2                            | P1     | O3     | 113(1)    |  | O4                        | Ni1    | O3     | 96(1)     |
| O1                            | P1     | C1     | 112(1)    |  | O4                        | Ni1    | O4     | 180(1)    |
| O2                            | P1     | C1     | 110(1)    |  | O1(1)                     | Ni2    | O1(2)  | 74(1)     |
| O3                            | P1     | C1     | 101(1)    |  | O1(1)                     | Ni2    | O3     | 89(1)     |
| P1                            | C1     | P2     | 114(1)    |  | O1(1)                     | Ni2    | O4     | 94(1)     |
| C1                            | P2     | O4     | 105(1)    |  | O1(1)                     | Ni2    | O5     | 175(1)    |
| C1                            | P2     | O5     | 111(1)    |  | O1(1)                     | Ni2    | O7     | 87(1)     |
| C1                            | P2     | O6     | 109(1)    |  | O1(2)                     | Ni2    | O3     | 98(1)     |
| O4                            | P2     | O5     | 112(1)    |  | O1(2)                     | Ni2    | O4     | 169(1)    |
| O4                            | P2     | O6     | 110(1)    |  | O1(2)                     | Ni2    | O5     | 101(1)    |
| O5                            | P2     | O6     | 110(1)    |  | O1(2)                     | Ni2    | O7     | 91(1)     |
| <b>O-Ni-O bond angles</b>     |        |        |           |  | O3                        | Ni2    | O4     | 79(1)     |
| O2                            | Ni1    | O2     | 180(1)    |  | O3                        | Ni2    | O5     | 92(1)     |
| O2                            | Ni1    | O3     | 91(1)     |  | O3                        | Ni2    | O7     | 168(1)    |
| O3                            | Ni1    | O2     | 89(1)     |  | O4                        | Ni2    | O5     | 90(1)     |
| O2                            | Ni1    | O4     | 83(1)     |  | O4                        | Ni2    | O7     | 90(1)     |
| O4                            | Ni1    | O2     | 97(1)     |  | O5                        | Ni2    | O7     | 92(1)     |

**Table S2** EXAFS fit results of pristine NiDMAMP and NiMeDP.

| Path                                                                                                                                                                 | <i>N</i> | $S_0^{2,\dagger}$ | <i>R</i> [Å] | $E_0$ [eV] | $\sigma^2$    | <i>R-value</i> |
|----------------------------------------------------------------------------------------------------------------------------------------------------------------------|----------|-------------------|--------------|------------|---------------|----------------|
| <b>Pristine NiDMAMP</b>                                                                                                                                              |          |                   |              |            |               |                |
| Ni-O                                                                                                                                                                 | 6.1±0.4  | 0.789             | 2.046±0.005  | -2.4±0.7   | 0.0061±0.0007 | 0.0081         |
| Ni-P                                                                                                                                                                 | 4±3*     |                   | 3.18±0.05    |            | 0.011±0.017*  |                |
| Ni-Ni                                                                                                                                                                | 2.5±1.7* |                   | 3.07±0.04    |            | 0.007±0.004*  |                |
| <b>Pristine NiMeDP</b>                                                                                                                                               |          |                   |              |            |               |                |
| Ni-O                                                                                                                                                                 | 6.4±0.5  | 0.789             | 2.058±0.004  | -2.0±0.6   | 0.006±0.001   | 0.0039         |
| Ni-P                                                                                                                                                                 | 4±8*     |                   | 3.22±0.09    |            | 0.01±0.04*    |                |
| Ni-Ni                                                                                                                                                                | 2±3*     |                   | 3.13±0.01    |            | 0.006±0.008*  |                |
| * The coordination number and mean square displacement values for P and Ni have a high uncertainty because their peaks strongly overlap due to their close R-values. |          |                   |              |            |               |                |
| † Derived from fitting the corresponding Ni metal foil reference                                                                                                     |          |                   |              |            |               |                |

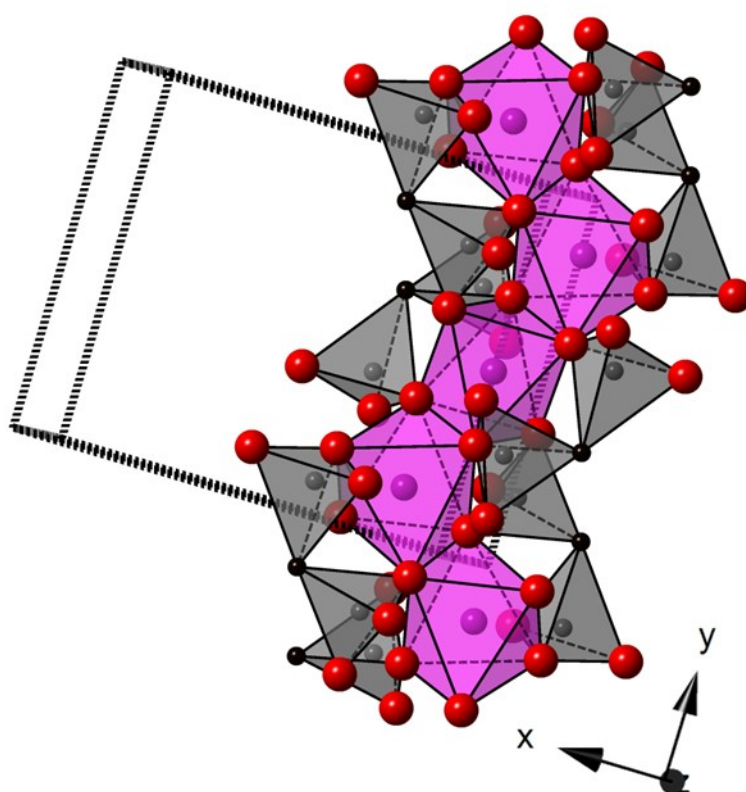**Figure S1** One chain representation of the NiMeDP structure, detail of the Figure 2.B.

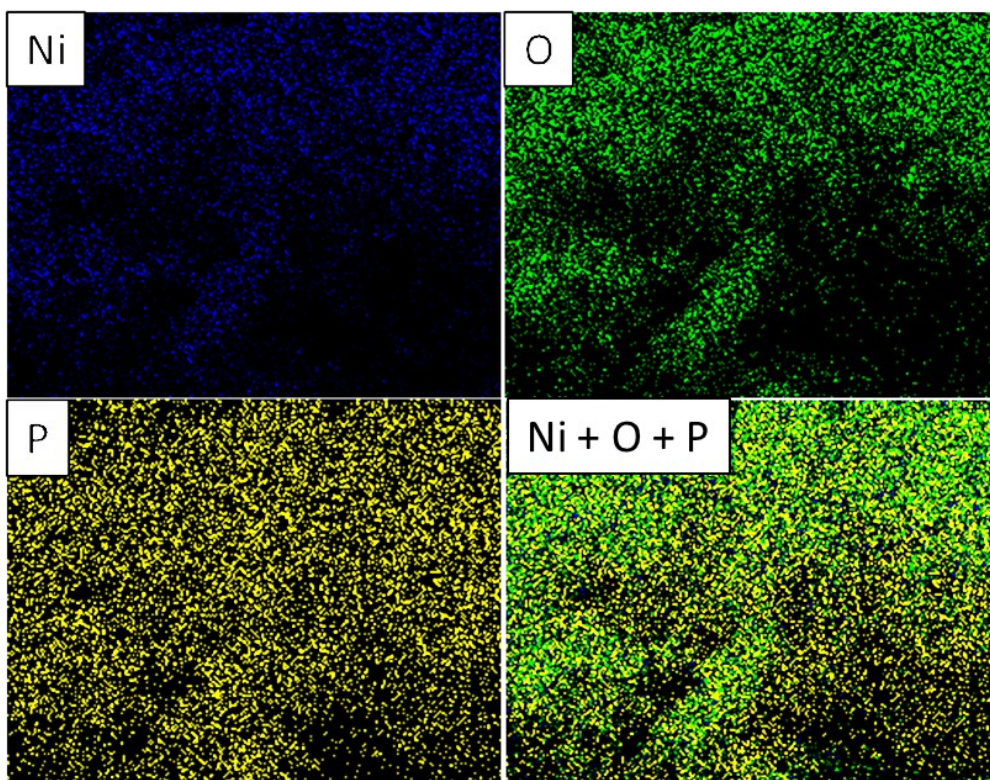

Figure S2 EDX mapping of the pristine NiDMAMPD.

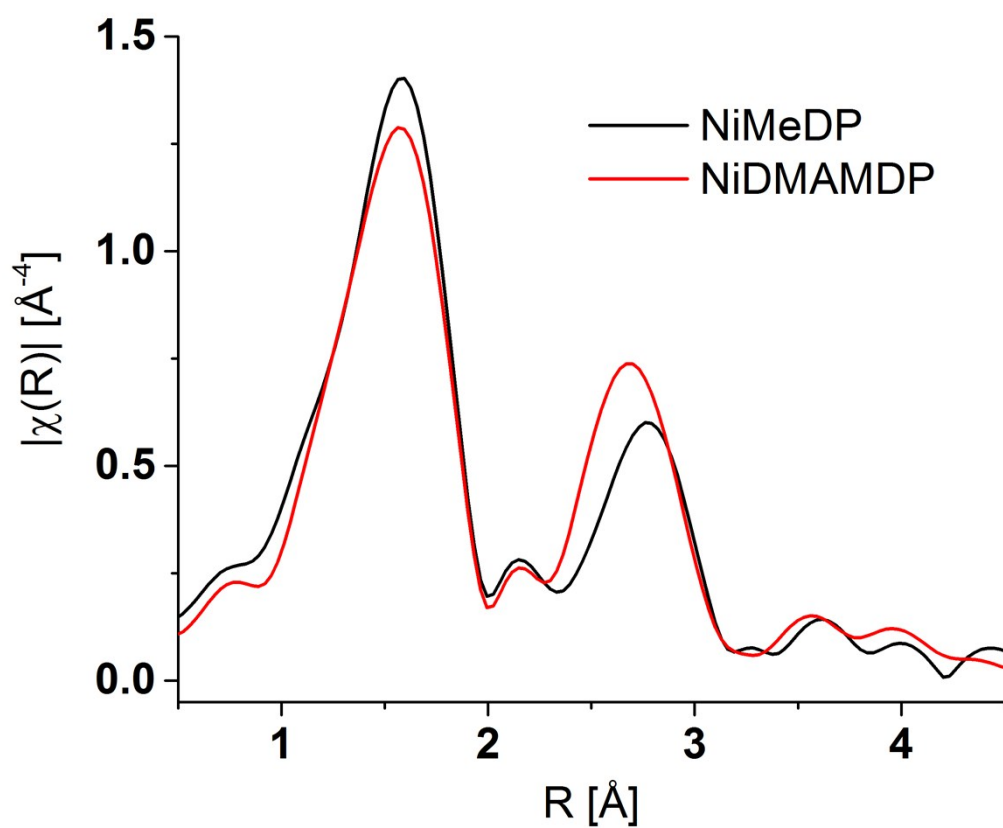

Figure S3 EXAFS spectra in R-space representation of pristine NiMeDP and NiDMAMPD.

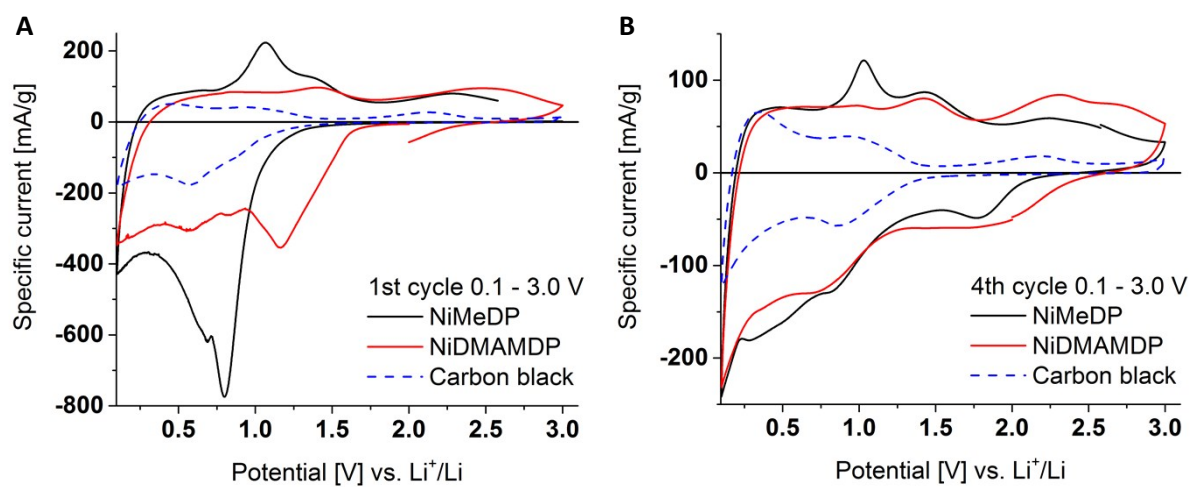

**Figure S4** Comparison of the cyclic voltammograms of NiMeDP and NiDMAMDP cycled at 100  $\mu\text{V/s}$  between 0.1 – 3.0 V. **A:** 1<sup>st</sup> cycle, **B:** 4<sup>th</sup> cycle.
